# Supplementary material for: Patterns of antidepressant therapy and clinical outcomes among ischaemic stroke survivors
Source: PubMed Central journal article supplement — Stroke Vasc Neurol. 2021 Feb 1;6(3):384–94. doi: 10.1136/svn-2020-000691 (PMC8485250; doi:10.1136/svn-2020-000691), 2021-02-01

## Supplementary Methods

### *Variables of Interest*

Race/ethnicity was categorized as Asian, Black, White, Hispanic (any race), or Other. Insurance status was categorized as self-pay/no insurance, Medicare, Medicaid, or the composite private/Veterans affairs/Champus/Other. Past medical history was obtained from electronic records including depression status and the presence of the following stroke risk factors: atrial fibrillation/flutter, previous IS, TIA, coronary artery disease, carotid stenosis, diabetes mellitus, peripheral vascular disease, smoking, dyslipidemia, peripheral vascular disease, hypertension, heart failure, or renal insufficiency.

Medications prior to admission and at discharge were recorded including use of the following agents: antiplatelet, anticoagulants, antihypertensives, antithrombotics, cholesterol-reducing medications, and diabetes medications. Ambulatory status at admission or discharge was defined using a three-level categorization of able to ambulate independently, ambulate with assistance, or unable to ambulate.

### *Outcomes/Endpoints*

All-cause mortality was ascertained on the basis of the death rate recorded in the vital status file. Readmission data was ascertained from the inpatient institutional file. Readmission diagnosis was determined using the International Classification of Diseases, Ninth or Tenth Revision, Clinical Modification (ICD-9/10-CM) discharge codes. IS/TIA readmission was determined by ICD-9/10-CM principal diagnoses codes of I63, G45, 362, 433-436, 346620-34663, G43601, G43609, G43611, G43619 on the inpatient claim. Cardiovascular readmission was determined by the Diagnosis Related Groups: 4011, 4019, 40200, 40201, 40210, 40211, 40290, 40291, 4030, 40300, 40301, 4031, 40310, 40311, 4039, 40390, 40391, 4040, 4044, 40401-40403, 4041, 40410, 40411-40413, 4049, 4049-40493, 4010, 40501, 40509, 40511, 40519, 40591, 40599, 4372, 3940, 3941, 3942, 3949-3952, 3959-3963, 3968-3971, 3979, 4240-4243, 42490, 42491, 42499, 7852, 7853, V422, V433, 4250, 4251, 42511, 42518, 4252-4254, 4257-4259, 3282, 3640, 3641-3643, 7420-7423, 11281, 11503, 11504, 11513, 11514, 11593, 11594, 1303, 3910-3912, 3918-3920, 393, 3980, 39890, 39899, 4200, 42090, 42091, 42099, 4210, 4211, 4219, 4220, 42290, 42291-42293, 42299, 4230-4233, 4238-4290, 4100, 41000-41002, 4101, 41010, 41011, 41012, 4102, 41020-41022, 4102, 41020-41032, 4104, 41040, 41041, 41042, 4105, 41050, 41051, 41052, 4106, 41060, 41061, 41062, 4107, 41070, 41071, 41072, 4108, 41080, 41081, 41082, 4109, 41090-41092, 41406, 4130, 4131, 4139, 4111, 4110, 4118, 41181, 41189, 4140, 41400, 41401, 4142, 4143, 4144, V4582, 412, 4148, 4149, V4581, 78650, 78651, 78659, 4150, 4151, 4152, 41513, 41519, 4160, 4161, 4162, 4168-4171, 4178, 4179, 41410, 41411, 41412, 41419, 4291-4293, 4295, 4296, 42971, 42979, 42981-42983, 42989, 4299, 4260, 42610, 42611, 42612, 42613, 4262-4264, 42650-42654, 4266, 4267, 42681, 42682, 42689, 4269, V450, V4500-V4502, V4509, V533, V5331, V5332, V5339, 4270, 4271, 42731, 42732, 42760, 42761, 42769, 42781, 4272, 42789, 4279, 7850, 7851, 42741, 42742, 4275, 42820-42823, 42830-42833, 42840-42843, 4280, 39891, 4281, 4289, 420, 431, 4320, 4321, 4329, 43301, 43311, 43321, 43331, 43381, 43391, 4340, 43400, 43401, 4341, 43410, 43411, 4349, 43490, 43491, 34660, 34661-34663, 436, 4330, 4330, 43300, 4331, 43310, 4332, 43320, 4333, 43330, 4338, 43380, 4339,

43390, 4370, 4371, 4373-4379, 4350-4353, 4358, 4359, 438, 4380, 43810-43814, 43819-43822, 43830-43832, 43840-43842, 43850-43853, 4386, 4387, 43881043885, 43889, 4389, 4402, 44020, 44021, 44022, 44023, 44029, 4404, 4439, 4400, 4401, 4408, 4409, 5570, 5571, 5579, 44321-44324, 44329, 4414, 44772, 4410, 44100, 44101-44103, 4411-4417, 4419-4423, 44281-44284, 44289, 4429, 44770, 44771, 44773, 44501, 44502, 44581, 44589, 44422, 4440, 44401, 44409, 4441, 44421, 44481, 44489, 4449, 4580, 4581, 4588, 4589, 4430, 4431, 44381, 44382, 44389, 4460, 4461, 4462, 44620, 44621, 44629, 4463-4467, 4470-4476, 4478-4481, 4489, 4590, 45989, 4599, 7859, 79430, 79431, 79439, 7962, V125, V1250, V1253, V1254, V1259, V151, V421, V432, V4321, V4322, V434, V717, 4510, 45111, 45119, 4512, 45181-45184, 45189, 4519, V1252, 452, 4530-4533, 45340-45342, 45350-45352, 4536, 45371-45377, 45379, 4538, 45381, 45382-45387, 45389, 4539, V1251, V1255, I312, I6000-I6002, I6010-I6012, I6020-I6022, I6030-I6032, 'I604', 'I6050', 'I6051', 'I6052', I606-I616, I618, I619, I6200-I6203, I621, I629, R58, I6300, I63011, I63012, I63019, I6302, I63031, I63032, I63039, I6309, I6310, I63111, I63112, I63119, I6312, I63131, I63132, I63139, I6319, I6320, I63211, I63212, I63219, I6322, I63231, I63232, I63239, I6329, I6330, I63311, I63312, I63319, I63321, I63322, I63329, I63331, I63332, I63339, I63341, I63342, I63349, I6339, I6340, I63411, I63412, I63419, I63421, I63422, I63429, I63431, I63432, I63439, I63441, I63442, I63449, I6349, I6350, I63511, I63512, I63519, I63521, I63522, I63529, I63531, I63532, I63539, I63541, I63542, I63549, I6359, I636, I638, I639, G43601, G43609, G43611, G43619, I7401, I7409-I7411, I7419, I742-I745, I748, I749, I75011-I75013, I75019, I75021-I75023, I75029, I7581, I7589, I2601, I2602, I2609, I2690, I2692, I2699, I81, I820, I821, I82210, I82211, I82220, I82221, I82290, I82291, I823, I82401-I82403, I82409, I82411-I82413, I82419, I82421-I82423, I82429, I82431-I82433, I82439, I82441-I82443, I82449, I82491-I82493, I82499, I824Y1-I824Y3, I824Y9, I824Z1-I824Z3, I824Z9, I82501-I82503, I82509, I82511-I82513, I82519, I82521-I82523, I82529, I82531-I82533, I82539, I82541-I82543, I82549, I82591-I82593, I82599, I825Y1-I825Y3, I825Y9, I825Z1, I825Z2, I825Z3, I825Z9, I82601-I82603, I82609, I82611-I82613, I82619, I82621-I82623, I82629, I82701-I82703, I82709, I82711-I82713, I82719, I82721-I82723, I82729, I82811-I82813, I82819, I82890, I82891, I8290, I8291, I82A11-I82A13, I82A19, I82A21, I82A22, I82A23, I82A29, I82B11-I82B13, I82B19, I82B21-I82B23, I82B29, I82C11-I82C13, I82C19, I82C21-I82C23, I82C29, A1884, B376, B394, B395, B399, B5881, E0851, E0852, E0951, E0952, E1051, E1052, E1151, E1152, E1351, E1352, G450, G451, G452, G454, G458-G468, H209, I010-I012, I018-I020, I050-I052, I058-I062, I068-I072, I078-I083, I088-I092, I0981, I0989, I099, I10, I110, I119, I120, I129, I130, I1310, I1311, I132, I150-I152, I158, I159, I200, I201, I208, I209, I2101, I2102, I2109, I2111, I2119, I2121, I2129, I213, I214, I220-I222, I228-I238, I240, I241, I248, I249, I2510, I25110, I25111, I25118, I25119, I252, I253, I2541, I2542, I255, I256, I25700, I25701, I25708-I25711, I25718-I25721, I25728-I25731, I25738, I25739, I25750, I25751, I25758-I25761, I25768, I25769, I25790, I25791, I25798, I25799, I25811, I2582-I2584, I2589, I259, I270-I272, I2781, I2782, I2789, I279, I280, I281, I288, I289, I300, I301, I308-I311, I313, I314, I318-I32, I330, I339-I342, I348-I352, I358-I362, I368-I372, I378, I379, I38, I39, I400, I401, I408, I409, I41, I420-I425, I427-I429, I43, I440-I442, I4430, I4439, I444, I445, I4460, I4469, I447, I450, I4510, I4519, I452-I456, I4581, I4589, I459, I462, I468-I472, I479-I484, I4891, I4892, I4901, I4902, I491-I493, I4940, I4949, I495, I498, I499, I501, I5020-I5023, I5030-I5033, I5040-I5043, I509-I515, I517, I5181, I5189, I519, I52, I6501-I6503, I6509, I651, I6521-I6523, I6529, I658, I659, I6601-I6603, I6609, I6611-I6613, I6619, I6621-I6623, I6629, I663, I668-I672, I674-I677, I6781, I6782, I67841, I67848, I6789, I679, I680, I682, I688, I6900, I6901, I69020-I69023, I69028, I69031-I69034, I69039, I69041-I69044,

I69049, I69051-I69054, I69059, I69061-I69065, I69069, I69090-I69093, I69098, I6910, I6911, I69120-I69123, I69128, I69131-I69134, I69139, I69141-I69144, I69149, I69151-I69154, I69159, I69161-I69165, I69169, I69190-I69193, I69198, I6920, I6921, I69220-I69223, I69228, I69231-I69234, I69239, I69241-I69244, I69249, I69251-I69254, I69259, I69261-I69265, I69269, I69290-I69293, I69298, I6930, I6931, I69320-I69323, I6932, I69331-I69334, I69339, I69341-I69344, I69349, I69351-I69354, I69359, I69361-I69365, I69369, I69390-I69393, I69398, I6980, I6981, I69820-I69823, I69828, I69831-I69834, I69839, I69841-I69844, I69849, I69851-I69854, I69859, I69861-I69865, I69869, I69890-I69893, I69898, I6990, I6991, I69920-I69923, I69928, I69931-I69934, I69939, I69941-I69944, I69949, I69951-I69954, I69959, I69961-I69965, I69969, I69990-I69993, I69998, I700, I701, I70201-I70203, I70208, I70209, I70211-I70213, I70218, I70219, I70221-I70223, I70228, I70229, I70231-I70235, I70238, I70239, I70241-I70245, I70248, I70249, I7025, I70291-I70293, I70298, I70299, I708, I7090-I7092, I7100-I7103, I711-I716, I718-I724, I728, I729, I7300, I7301, I731, I7381, I7389, I739, I770-I776, I7771-I7774, I7779, I77810-I77812, I77819, I7789, I779-I781, I788-I791, I798, I8000-I8003, I8010-I8013, I80201-I80203, I80209, I80211-I80213, I80219, I80221-I80223, I80229, I80231-I80233, I80239, I80291-I80293, I80299, I803, I808, I809, I878, I879, I950, I951, I9589, I959, I998, I999, K550, K551, K558, K559, M300-M303, M308, M310-M312, M3130, M3131, M314-M318, M319, M3211, M3212, N262, Q010-Q012, Q018-Q02, Q030, Q031, Q038-Q043, R000-R002, R008, R009, R010-R012, R030, R072, R0782, R0789, R079, R0989, R9430, R9431, R9439, Z0389, Z45010, Z45018, Z4502, Z4509, Z4821, Z48280, Z86711, Z86718, Z8672-Z8674, Z8679, Z941, Z943, Z950-Z955, Z95810-Z95812, Z95818, Z95820, Z95828, Z959, Z9861, Z9889. Non-cardiovascular readmission was defined as all readmissions not meeting cardiovascular readmission criteria. Depression related readmission was defined as completed suicide, suicide attempt or major depressive episode (major depressive disorder [ICD-9-CM 296.2, 296.3, 296.5, 298.0, or 311], completed suicide/suicide attempt [ICD-9-CM E950-E959\*], suicide ideation [ICD-9-CM V62.84], or suicide tendencies [ICD-9-CM 300.9]). Sepsis related readmission was defined as ICD-9/10-CM principal diagnoses codes of 0202, 0223, 0362, 0380, 0381, 03810-03812, 03819, 0382, 0383, 03840-03844, 03849, 0388, 0389, 0545, 449, 77181, 7907, 99591, 99592, A021, A207, A227, A267, A327, A392-A394, A400, A401, A403 A408, A409, A4101, A4102, A411-A414, Z4150-Z4153, A4159, A4181, A4189, A419, A427, A5486, B007, B377, I76, P360, P3610, P3619, P362, P3630, P3639, P364, P365, P368, P369, R6520.

### *Statistical Analysis*

IQVIA serves as the data collection (through their Patient Management Tool™ – PMT™) and coordination center for GWTG. The Duke Clinical Research Institute serves as the data analysis center and has an agreement to analyze the aggregate de-identified data for research purposes.

**Supplementary Table S1:** Variable missing rates and imputation methods in the study

population.

| Variable                        | Overall<br>N=28,401 | AD Yes<br>N=7,565 | AD No<br>N=20,836 | Naïve<br>N=21,805 | AD Yes<br>N=1,835 | AD No<br>N=19,970 | Imputation Methods                                                                        |
|---------------------------------|---------------------|-------------------|-------------------|-------------------|-------------------|-------------------|-------------------------------------------------------------------------------------------|
| <b>Demographics</b>             |                     |                   |                   |                   |                   |                   |                                                                                           |
| Age                             | 0.0                 | 0.0               | 0.0               | 0.0               | 0.0               | 0.0               | N/A                                                                                       |
| Female                          | 0.0                 | 0.0               | 0.0               | 0.0               | 0.0               | 0.0               | N/A                                                                                       |
| Race/Ethnicity                  | 0.0                 | 0.0               | 0.0               | 0.0               | 0.0               | 0.0               | N/A                                                                                       |
| Insurance Status                | 2.7                 | 3.2               | 2.6               | 2.6               | 3.5               | 2.5               | Set missing to No, as we assume medical history was missing when none applied.            |
| <b>Medical History</b>          | 0.0                 | 0.0               | 0.0               | 0.0               | 0.0               | 0.0               | N/A                                                                                       |
| <b>Prior Medications</b>        |                     |                   |                   |                   |                   |                   |                                                                                           |
| Antidepressants                 | 1.1                 | 1.1               | 1.1               | 1.1               | 1.1               | 1.1               |                                                                                           |
| Antiplatelets                   | 8.1                 | 8.0               | 8.1               | 8.0               | 7.8               | 8.0               |                                                                                           |
| Anticoagulants                  | 47.2                | 51.2              | 45.8              | 45.7              | 47.5              | 45.6              |                                                                                           |
| Antihypertensives               | 0.3                 | 0.4               | 0.2               | 0.1               | 0.0               | 0.1               |                                                                                           |
| Cholesterol-Reducers            | 0.0                 | 0.0               | 0.0               | 0.0               | 0.0               | 0.0               |                                                                                           |
| Diabetic Medications            | 0.5                 | 0.9               | 0.4               | 0.1               | 0.1               | 0.1               |                                                                                           |
| <b>Presentation</b>             |                     |                   |                   |                   |                   |                   |                                                                                           |
| EMS Arrival                     | 2.3                 | 2.5               | 2.2               | 2.2               | 3.2               | 2.1               | Set missing to No, as we assume EMS status was routinely recorded by ambulance personnel. |
| On time arrival                 | 0.5                 | 0.5               | 0.5               | 0.5               | 0.4               | 0.5               | Set missing to No, which is the more prevalent level.                                     |
| Onset to arrival times (min)    | 40.3                | 41.3              | 39.9              | 39.9              | 39.4              | 39.9              |                                                                                           |
| Initial NIHSS                   | 14.8                | 15.4              | 14.6              | 14.4              | 12.9              | 14.5              | Will not impute, complete case analysis only.                                             |
| Ambulatory Status at Admission  | 25.5                | 25.5              | 25.5              | 25.6              | 27.6              | 25.4              | Set missing as a category.                                                                |
| Stroke Symptoms resolved        | 2.3                 | 3.1               | 2.0               | 2.0               | 3.2               | 1.9               |                                                                                           |
| <b>Lab and Vitals</b>           |                     |                   |                   |                   |                   |                   |                                                                                           |
| Heart Rate (30-200), bpm        | 6.6                 | 7.9               | 6.1               | 6.1               | 7.9               | 5.9               |                                                                                           |
| SBP (50-250), mm Hg             | 6.6                 | 7.8               | 6.2               | 6.1               | 7.8               | 6.0               |                                                                                           |
| DBP (20-200), mm Hg             | 6.5                 | 7.6               | 6.0               | 5.9               | 7.4               | 5.8               |                                                                                           |
| BMI (10-100), kg/m <sup>2</sup> | 11.0                | 12.6              | 10.4              | 10.6              | 14.7              | 10.2              |                                                                                           |
| HDL (0-120), mg/dL              | 13.8                | 15.1              | 13.3              | 13.1              | 14.4              | 13.0              |                                                                                           |
| LDL (30-500), mg/dL             | 9.8                 | 10.9              | 9.5               | 9.5               | 10.7              | 9.4               | Impute to cohort median.                                                                  |
| HgbA1c (0-20), %                | 41.2                | 41.8              | 41.0              | 40.5              | 38.0              | 40.7              |                                                                                           |
| <b>Discharge</b>                |                     |                   |                   |                   |                   |                   |                                                                                           |
| Ambulatory status at discharge  | 3.4                 | 3.3               | 3.4               | 3.4               | 3.3               | 3.4               |                                                                                           |
| Antihypertensives               | 1.2                 | 1.6               | 1.0               | 1.0               | 1.1               | 1.0               |                                                                                           |
| Antithrombotics                 | 0.0                 | 0.0               | 0.0               | 0.0               | 0.0               | 0.0               |                                                                                           |
| Antiplatelets                   | 3.8                 | 3.6               | 3.9               | 3.8               | 3.7               | 3.8               |                                                                                           |
| Aspirin                         | 3.8                 | 3.6               | 3.9               | 3.8               | 3.7               | 3.8               |                                                                                           |
| Anticoagulants                  | 3.8                 | 3.6               | 3.9               | 3.8               | 3.7               | 3.8               |                                                                                           |

**Supplementary Table S2: Baseline characteristics by discharge SSRI in AD naïve stroke**

patients (N=377).

| Variable                                 | Overall<br>N=377 | SSRI AD Yes<br>N=263 | SSRI AD No<br>N=114 | P Value      |
|------------------------------------------|------------------|----------------------|---------------------|--------------|
| <b>Demographics</b>                      |                  |                      |                     |              |
| Age*                                     | 79 (71 - 85)     | 78 (71 - 85)         | 80 (75 - 87)        | <b>0.027</b> |
| Gender                                   |                  |                      |                     | 0.704        |
| Female                                   | 59.95            | 59.32                | 61.40               |              |
| Male                                     | 40.05            | 40.68                | 38.60               |              |
| Race/Ethnicity                           |                  |                      |                     | 0.501        |
| White                                    | 85.15            | 85.17                | 85.09               |              |
| Black                                    | 8.75             | 9.51                 | 7.02                |              |
| Hispanic (any race)                      | 2.92             | 3.04                 | 2.63                |              |
| Asian                                    | 0.80             | 0.38                 | 1.75                |              |
| Other (includes UTD)                     | 2.39             | 1.90                 | 3.51                |              |
| Insurance Status                         |                  |                      |                     | 0.237        |
| Self Pay/No Insurance                    | 0.28             | 0.40                 | 0.00                |              |
| Medicare                                 | 52.49            | 52.38                | 52.73               |              |
| Medicaid                                 | 6.35             | 4.76                 | 10.00               |              |
| Private/VA/Champus/Other                 | 40.88            | 42.46                | 37.27               |              |
| <b>Medical History</b>                   |                  |                      |                     |              |
| Depression                               | 20.16            | 20.91                | 18.42               | 0.58         |
| Atrial Fibrillation/Flutter              | 22.28            | 20.91                | 25.44               | 0.333        |
| Stroke                                   | 25.46            | 25.48                | 25.44               | 0.994        |
| TIA                                      | 10.08            | 9.13                 | 12.28               | 0.351        |
| CAD/Prior MI                             | 25.73            | 27.38                | 21.93               | 0.267        |
| Carotid Stenosis                         | 4.51             | 5.32                 | 2.63                | 0.248        |
| Diabetes Mellitus                        | 33.42            | 33.08                | 34.21               | 0.831        |
| PVD                                      | 6.90             | 7.60                 | 5.26                | 0.411        |
| Hypertension                             | 83.02            | 81.37                | 86.84               | 0.194        |
| Smoker                                   | 12.73            | 12.55                | 13.16               | 0.871        |
| Dyslipidemia                             | 56.76            | 55.89                | 58.77               | 0.605        |
| Heart Failure                            | 9.02             | 8.37                 | 10.53               | 0.502        |
| Renal Insufficiency                      | 5.84             | 6.84                 | 3.51                | 0.205        |
| <b>Medications Prior to Admission</b>    |                  |                      |                     |              |
| Antiplatelets                            | 58.50            | 57.32                | 61.39               | 0.485        |
| Anticoagulants                           | 21.83            | 18.84                | 28.81               | 0.1217       |
| Antihypertensives                        | 74.80            | 73.76                | 77.19               | 0.4819       |
| Cholesterol-Reducers                     | 51.72            | 52.09                | 50.88               | 0.8288       |
| Diabetic Medications                     | 25.27            | 24.81                | 26.32               | 0.7577       |
| <b>Presentation</b>                      |                  |                      |                     |              |
| EMS Arrival                              | 50.82            | 46.12                | 61.82               | <b>0.006</b> |
| On time arrival (non-holiday, M-F 7a-6p) | 49.47            | 48.66                | 51.33               | 0.636        |
| Onset to arrival times (min)*            | 228.5 (93 - 646) | 226 (110 - 637)      | 233 (86 - 707)      | 0.815        |
| Onset to arrival times (min)             |                  |                      |                     | 0.465        |
| >=241                                    | 47.39            | 46.67                | 49.23               |              |
| >=120 and <241                           | 22.17            | 24.24                | 16.92               |              |
| <120                                     | 30.43            | 29.09                | 33.85               |              |
| initial NIHSS*                           | 5 (2 - 10)       | 4 (2 - 10)           | 5 (2 - 10)          | 0.557        |
| initial NIHSS                            |                  |                      |                     | 0.335        |
| >=15                                     | 12.84            | 11.16                | 17.02               |              |
| >=6 and <15                              | 30.89            | 30.90                | 30.85               |              |
| <6                                       | 56.27            | 57.94                | 52.13               |              |
| Recorded Initial NIHSS Score             | 86.74            | 88.59                | 82.46               | 0.107        |
| Ambulatory Status at Admission           |                  |                      |                     | 0.828        |

| Variable                                         | Overall<br>N=377 | SSRI AD Yes<br>N=263 | SSRI AD No<br>N=114 | P Value      |
|--------------------------------------------------|------------------|----------------------|---------------------|--------------|
| Able to ambulate independently                   | 27.80            | 28.64                | 25.64               |              |
| With assistance from person                      | 37.18            | 36.18                | 39.74               |              |
| Unable to ambulate                               | 35.02            | 35.18                | 34.62               |              |
| Stroke Symptoms resolved at time of presentation | 9.59             | 10.32                | 7.96                | 0.716        |
| <b>Discharge</b>                                 |                  |                      |                     |              |
| Ambulatory status at discharge                   |                  |                      |                     | <b>0.041</b> |
| Able to ambulate independently                   | 34.88            | 38.37                | 26.61               |              |
| With assistance from person                      | 47.96            | 43.80                | 57.80               |              |
| Unable to ambulate                               | 17.17            | 17.83                | 15.60               |              |
| Discharge Destination                            |                  |                      |                     | <b>0.033</b> |
| Home                                             | 33.16            | 31.94                | 35.96               |              |
| Inpatient Rehabilitation Facility (IRF)          | 33.69            | 38.02                | 23.68               |              |
| Skilled Nursing Facility (SNF)                   | 30.77            | 27.38                | 38.60               |              |
| Other Health Care Facility                       | 2.39             | 2.66                 | 1.75                |              |
| Antihypertensives                                | 91.96            | 92.28                | 91.23               | 0.732        |
| Antithrombotics                                  | 97.08            | 97.72                | 95.61               | 0.532        |
| Antiplatelets                                    | 85.79            | 87.16                | 82.57               | 0.251        |
| Aspirin                                          | 69.67            | 72.37                | 63.30               | 0.085        |
| Anticoagulants                                   | 33.61            | 33.85                | 33.03               | 0.879        |

\* P-values from chi-squared tests for independence for categorical variables and Wilcoxon rank sum tests for continuous variables.

**Supplementary Table S3: SSRI AD vs. non-SSRI AD and clinical outcomes at one year post ischemic stroke discharge.**

| Outcomes at 1 Year                               | Cumulative Incidence | Unadjusted         |                             | Weight Adjusted             |                             | NIHSS Weight Adjusted |              |
|--------------------------------------------------|----------------------|--------------------|-----------------------------|-----------------------------|-----------------------------|-----------------------|--------------|
|                                                  |                      | HR (95% CI)        | P Value                     | HR (95% CI)                 | P Value                     | HR (95% CI)           | P Value      |
| All-cause mortality                              |                      |                    |                             |                             |                             |                       |              |
| SSRI AD                                          | 53 (20.15)           | 0.65 (0.43, 0.99)  | <b>0.046</b>                | 0.73 (0.47, 1.12)           | 0.148                       | 0.83 (0.51, 1.35)     | 0.449        |
| Non-SSRI AD                                      | 33 (28.95)           | Reference          |                             | Reference                   |                             | Reference             |              |
| All-cause readmission                            |                      |                    |                             |                             |                             |                       |              |
| SSRI AD                                          | 108 (42.80)          | 0.76 (0.56, 1.02)  | 0.07                        | 0.81 (0.59, 1.12)           | 0.205                       | 0.82 (0.58, 1.18)     | 0.291        |
| Non-SSRI AD                                      | 55 (49.10)           | Reference          |                             | Reference                   |                             | Reference             |              |
| Composite of mortality and all-cause readmission |                      |                    |                             |                             |                             |                       |              |
| SSRI AD                                          | 129 (51.10)          | 0.75 (0.57, 0.99)  | <b>0.042</b>                | 0.82 (0.61, 1.09)           | 0.169                       | 0.83 (0.60, 1.16)     | 0.283        |
| Non-SSRI AD                                      | 66 (58.92)           | Reference          |                             | Reference                   |                             | Reference             |              |
| CV readmission                                   |                      |                    |                             |                             |                             |                       |              |
| SSRI AD                                          | 54 (21.36)           | 0.79 (0.51, 1.23)  | 0.30                        | 0.83 (0.53, 1.31)           | 0.422                       | 0.80 (0.49, 1.30)     | 0.361        |
| Non-SSRI AD                                      | 27 (24.11)           | Reference          |                             | Reference                   |                             | Reference             |              |
| MACE (Composite of mortality and CV readmission) |                      |                    |                             |                             |                             |                       |              |
| SSRI AD                                          | 90 (35.64)           | 0.68 (0.49, 0.95)  | <b>0.024</b>                | 0.74 (0.53, 1.04)           | 0.085                       | 0.79 (0.54, 1.17)     | 0.24         |
| Non-SSRI AD                                      | 52 (46.46)           | Reference          |                             | Reference                   |                             | Reference             |              |
| IS/TIA readmission                               |                      |                    |                             |                             |                             |                       |              |
| SSRI AD                                          | 18 (7.10)            | 0.51 (0.25, 1.05)  | 0.069                       | 0.49 (0.23, 1.03)           | 0.06                        | 0.40 (0.17, 0.93)     | <b>0.033</b> |
| Non-SSRI AD                                      | 14 (12.47)           | Reference          |                             | Reference                   |                             | Reference             |              |
| ICH readmission                                  |                      |                    |                             |                             |                             |                       |              |
| SSRI AD                                          | 4 (1.58)             | 1.72 (0.20, 14.91) | 0.62                        | 1.49 (0.17, 13.00)          | 0.719                       | 0.95 (0.09, 10.46)    | 0.97         |
| Non-SSRI AD                                      | 1 (0.89)             | Reference          |                             | Reference                   |                             | Reference             |              |
| Non-CV readmission                               |                      |                    |                             |                             |                             |                       |              |
| SSRI AD                                          | 73 (29.04)           | 0.72 (0.50, 1.04)  | 0.08                        | 0.79 (0.54, 1.15)           | 0.212                       | 0.85 (0.55, 1.30)     | 0.445        |
| Non-SSRI AD                                      | 41 (36.62)           | Reference          |                             | Reference                   |                             | Reference             |              |
| Readmission with depression                      |                      |                    |                             |                             |                             |                       |              |
| SSRI AD                                          | 41 (16.27)           | 0.85 (0.49, 1.48)  | 0.562                       | 0.89 (0.50, 1.58)           | 0.696                       | 0.77 (0.42, 1.41)     | 0.391        |
| Non-SSRI AD                                      | 20 (17.91)           | Reference          |                             | Reference                   |                             | Reference             |              |
| Readmission with sepsis                          |                      |                    |                             |                             |                             |                       |              |
| SSRI AD                                          | 24 (9.51)            | 0.84 (0.41, 1.75)  | 0.65                        | 0.85 (0.40, 1.80)           | 0.674                       | 0.87 (0.41, 1.82)     | 0.712        |
| Non-SSRI AD                                      | 12 (10.71)           | Reference          |                             | Reference                   |                             | Reference             |              |
|                                                  |                      | <b>Mean (SD)</b>   | Difference (95% CI) P Value | Difference (95% CI) P Value | Difference (95% CI) P Value |                       |              |
| Home-time, days                                  |                      |                    |                             |                             |                             |                       |              |
| SSRI AD                                          | 284.0 (123.6)        | 13.2 (-13.3, 39.6) | 0.333                       | 13.4 (-12.9, 39.6)          | 0.32                        | 6.5 (-22.3, 35.4)     | 0.658        |
| Non-SSRI AD                                      | 276.0 (128.7)        | Reference          |                             | Reference                   |                             | Reference             |              |

**Supplementary Table S4: AD use and clinical outcomes at one year post IS discharge by subgroups.**

| Outcomes at One Year                                    | Unadjusted        |                  | Weight Adjusted   |                  | NIHSS Weight Adjusted |                  |
|---------------------------------------------------------|-------------------|------------------|-------------------|------------------|-----------------------|------------------|
|                                                         | HR (95% CI)       | P Value          | HR (95% CI)       | P Value          | HR (95% CI)           | P Value          |
| <b>Composite of mortality and all-cause readmission</b> |                   |                  |                   |                  |                       |                  |
|                                                         |                   | <i>0.602</i>     |                   | <i>0.805</i>     |                       | <i>0.967</i>     |
| Age ≥80y                                                | 1.22 (1.12, 1.34) | <b>&lt;0.001</b> | 1.19 (1.09, 1.30) | <b>&lt;0.001</b> | 1.16 (1.06, 1.28)     | <b>0.002</b>     |
| Age <80y                                                | 1.27 (1.15, 1.40) | <b>&lt;0.001</b> | 1.21 (1.09, 1.34) | <b>&lt;0.001</b> | 1.17 (1.04, 1.30)     | <b>0.006</b>     |
|                                                         |                   | <i>0.828</i>     |                   | <i>0.799</i>     |                       | <i>0.987</i>     |
| Female                                                  | 1.22 (1.12, 1.32) | <b>&lt;0.001</b> | 1.18 (1.09, 1.28) | <b>&lt;0.001</b> | 1.16 (1.06, 1.27)     | <b>0.001</b>     |
| Male                                                    | 1.23 (1.12, 1.36) | <b>&lt;0.001</b> | 1.20 (1.09, 1.33) | <b>&lt;0.001</b> | 1.16 (1.04, 1.29)     | <b>0.007</b>     |
|                                                         |                   | <i>0.502</i>     |                   | <i>0.566</i>     |                       | <i>0.414</i>     |
| White                                                   | 1.22 (1.14, 1.31) | <b>&lt;0.001</b> | 1.18 (1.10, 1.26) | <b>&lt;0.001</b> | 1.15 (1.06, 1.23)     | <b>&lt;0.001</b> |
| Non-White                                               | 1.29 (1.11, 1.50) | <b>&lt;0.001</b> | 1.24 (1.06, 1.45) | <b>0.007</b>     | 1.23 (1.05, 1.44)     | <b>0.011</b>     |
|                                                         |                   | <i>0.028</i>     |                   | <i>0.069</i>     |                       | <i>0.067</i>     |
| NIHSS >4                                                | 1.10 (1.01, 1.20) | <b>0.036</b>     | 1.08 (0.99, 1.19) | 0.073            | 1.09 (1.00, 1.19)     | 0.056            |
| NIHSS ≤4                                                | 1.27 (1.15, 1.41) | <b>&lt;0.001</b> | 1.23 (1.11, 1.36) | <b>&lt;0.001</b> | 1.24 (1.12, 1.37)     | <b>&lt;0.001</b> |
|                                                         |                   | <b>&lt;0.001</b> |                   | <b>&lt;0.001</b> |                       | <b>&lt;0.001</b> |
| History of depression Yes                               | 0.90 (0.76, 1.07) | 0.234            | 0.88 (0.74, 1.04) | 0.144            | 0.85 (0.71, 1.02)     | 0.085            |
| History of depression No                                | 1.26 (1.18, 1.35) | <b>&lt;0.001</b> | 1.25 (1.16, 1.33) | <b>&lt;0.001</b> | 1.22 (1.13, 1.31)     | <b>&lt;0.001</b> |
| <b>CV readmission</b>                                   |                   |                  |                   |                  |                       |                  |
|                                                         |                   | <i>0.316</i>     |                   | <i>0.494</i>     |                       | <i>0.513</i>     |
| Age ≥80y                                                | 1.04 (0.89, 1.21) | 0.634            | 1.06 (0.91, 1.23) | 0.454            | 1.03 (0.87, 1.21)     | 0.74             |
| Age <80y                                                | 1.16 (1.00, 1.35) | <b>0.044</b>     | 1.15 (0.99, 1.33) | 0.074            | 1.11 (0.95, 1.31)     | 0.182            |
|                                                         |                   | <i>0.279</i>     |                   | <i>0.316</i>     |                       | <i>0.507</i>     |
| Female                                                  | 1.05 (0.92, 1.20) | 0.457            | 1.06 (0.92, 1.21) | 0.416            | 1.04 (0.90, 1.21)     | 0.574            |
| Male                                                    | 1.18 (1.01, 1.37) | <b>0.035</b>     | 1.18 (1.01, 1.38) | 0.038            | 1.13 (0.95, 1.33)     | 0.168            |
|                                                         |                   | <i>0.77</i>      |                   | <i>0.763</i>     |                       | <i>0.604</i>     |
| White                                                   | 1.11 (1.00, 1.24) | <b>0.048</b>     | 1.11 (1.00, 1.24) | 0.054            | 1.09 (0.97, 1.23)     | 0.16             |
| Non-White                                               | 1.07 (0.84, 1.37) | 0.573            | 1.07 (0.84, 1.37) | 0.592            | 1.01 (0.78, 1.31)     | 0.94             |
|                                                         |                   | <i>0.125</i>     |                   | <i>0.277</i>     |                       | <i>0.25</i>      |
| NIHSS >4                                                | 0.98 (0.84, 1.14) | 0.797            | 1.01 (0.86, 1.18) | 0.945            | 1.01 (0.86, 1.18)     | 0.934            |
| NIHSS ≤4                                                | 1.16 (1.00, 1.34) | 0.052            | 1.14 (0.98, 1.32) | 0.096            | 1.15 (0.99, 1.34)     | 0.076            |
|                                                         |                   | <i>0.865</i>     |                   | <i>0.995</i>     |                       | <i>0.907</i>     |



| Outcomes at One Year      | Unadjusted        |         | Weight Adjusted   |         | NIHSS Weight Adjusted |         |
|---------------------------|-------------------|---------|-------------------|---------|-----------------------|---------|
|                           | HR (95% CI)       | P Value | HR (95% CI)       | P Value | HR (95% CI)           | P Value |
| History of depression Yes | 1.14 (0.87, 1.49) | 0.358   | 1.11 (0.84, 1.46) | 0.467   | 1.09 (0.82, 1.47)     | 0.551   |
| History of depression No  | 1.11 (0.99, 1.24) | 0.066   | 1.11 (0.99, 1.23) | 0.069   | 1.07 (0.95, 1.21)     | 0.242   |
| <b>IS/TIA readmission</b> |                   |         |                   |         |                       |         |
|                           |                   | 0.06    |                   | 0.058   |                       | 0.022   |
| Age ≥80y                  | 0.88 (0.69, 1.13) | 0.332   | 0.88 (0.68, 1.13) | 0.32    | 0.80 (0.60, 1.05)     | 0.109   |
| Age <80y                  | 1.20 (0.99, 1.46) | 0.067   | 1.20 (0.99, 1.47) | 0.069   | 1.19 (0.96, 1.48)     | 0.105   |
|                           |                   | 0.489   |                   | 0.384   |                       | 0.991   |
| Female                    | 1.03 (0.84, 1.27) | 0.785   | 1.01 (0.81, 1.24) | 0.962   | 1.02 (0.82, 1.27)     | 0.851   |
| Male                      | 1.15 (0.92, 1.43) | 0.229   | 1.15 (0.92, 1.44) | 0.213   | 1.02 (0.79, 1.32)     | 0.86    |
|                           |                   | 0.537   |                   | 0.733   |                       | 0.674   |
| White                     | 1.09 (0.93, 1.29) | 0.294   | 1.08 (0.91, 1.28) | 0.378   | 1.04 (0.86, 1.25)     | 0.688   |
| Non-White                 | 0.96 (0.67, 1.39) | 0.844   | 1.01 (0.70, 1.45) | 0.973   | 0.94 (0.61, 1.44)     | 0.776   |
|                           |                   | 0.51    |                   | 0.731   |                       | 0.696   |
| NIHSS >4                  | 0.97 (0.77, 1.23) | 0.818   | 0.99 (0.78, 1.26) | 0.954   | 0.99 (0.78, 1.25)     | 0.925   |
| NIHSS ≤4                  | 1.08 (0.86, 1.36) | 0.495   | 1.05 (0.83, 1.33) | 0.673   | 1.06 (0.84, 1.33)     | 0.651   |
|                           |                   | 0.421   |                   | 0.563   |                       | 0.423   |
| History of depression Yes | 1.27 (0.84, 1.92) | 0.258   | 1.20 (0.79, 1.84) | 0.395   | 1.22 (0.77, 1.92)     | 0.391   |
| History of depression No  | 1.06 (0.89, 1.25) | 0.535   | 1.05 (0.89, 1.24) | 0.581   | 1.00 (0.83, 1.20)     | 0.963   |
| <b>ICH readmission</b>    |                   |         |                   |         |                       |         |
|                           |                   | 0.361   |                   | 0.542   |                       | 0.517   |
| Age ≥80y                  | 1.49 (0.78, 2.86) | 0.232   | 1.25 (0.63, 2.45) | 0.524   | 1.19 (0.57, 2.45)     | 0.647   |
| Age <80y                  | 0.97 (0.50, 1.87) | 0.924   | 0.93 (0.47, 1.82) | 0.822   | 0.83 (0.39, 1.80)     | 0.645   |
|                           |                   | 0.231   |                   | 0.252   |                       | 0.099   |
| Female                    | 1.49 (0.85, 2.60) | 0.165   | 1.32 (0.74, 2.35) | 0.342   | 1.38 (0.75, 2.54)     | 0.305   |
| Male                      | 0.77 (0.31, 1.90) | 0.573   | 0.70 (0.28, 1.74) | 0.441   | 0.45 (0.14, 1.46)     | 0.182   |
|                           |                   | 0.292   |                   | 0.379   |                       | 0.201   |
| White                     | 1.03 (0.57, 1.87) | 0.911   | 0.92 (0.51, 1.69) | 0.798   | 0.80 (0.41, 1.56)     | 0.507   |
| Non-White                 | 1.77 (0.81, 3.88) | 0.154   | 1.46 (0.65, 3.26) | 0.356   | 1.65 (0.69, 3.95)     | 0.26    |
|                           |                   | 0.663   |                   | 0.726   |                       | 0.788   |
| NIHSS >4                  | 1.19 (0.64, 2.22) | 0.588   | 1.04 (0.55, 1.98) | 0.904   | 1.04 (0.54, 1.98)     | 0.915   |
| NIHSS ≤4                  | 0.93 (0.38, 2.27) | 0.878   | 0.85 (0.34, 2.12) | 0.73    | 0.89 (0.36, 2.21)     | 0.798   |
|                           |                   | 0.519   |                   | 0.499   |                       | 0.626   |
| History of depression Yes | 0.78 (0.25, 2.44) | 0.67    | 0.74 (0.24, 2.33) | 0.613   | 0.76 (0.24, 2.44)     | 0.644   |

| Outcomes at One Year               | Unadjusted        |                  | Weight Adjusted   |                  | NIHSS Weight Adjusted |                  |
|------------------------------------|-------------------|------------------|-------------------|------------------|-----------------------|------------------|
|                                    | HR (95% CI)       | P Value          | HR (95% CI)       | P Value          | HR (95% CI)           | P Value          |
| History of depression No           | 1.18 (0.70, 1.97) | 0.539            | 1.14 (0.68, 1.92) | 0.608            | 1.05 (0.59, 1.86)     | 0.876            |
| <b>Non-CV readmission</b>          |                   |                  |                   |                  |                       |                  |
|                                    |                   | <i>0.737</i>     |                   | <i>0.946</i>     |                       | <i>0.882</i>     |
| Age ≥80y                           | 1.27 (1.14, 1.42) | <b>&lt;0.001</b> | 1.22 (1.09, 1.36) | <b>&lt;0.001</b> | 1.17 (1.04, 1.32)     | <b>0.008</b>     |
| Age <80y                           | 1.30 (1.17, 1.45) | <b>&lt;0.001</b> | 1.21 (1.09, 1.34) | <b>&lt;0.001</b> | 1.19 (1.05, 1.34)     | <b>0.005</b>     |
|                                    |                   | <i>0.447</i>     |                   | <i>0.317</i>     |                       | <i>0.314</i>     |
| Female                             | 1.23 (1.11, 1.35) | <b>&lt;0.001</b> | 1.17 (1.06, 1.29) | <b>0.002</b>     | 1.14 (1.02, 1.27)     | <b>0.02</b>      |
| Male                               | 1.30 (1.16, 1.47) | <b>&lt;0.001</b> | 1.26 (1.12, 1.42) | <b>&lt;0.001</b> | 1.24 (1.09, 1.41)     | <b>0.001</b>     |
|                                    |                   | <i>0.197</i>     |                   | <i>0.283</i>     |                       | <i>0.125</i>     |
| White                              | 1.25 (1.15, 1.35) | <b>&lt;0.001</b> | 1.18 (1.08, 1.28) | <b>&lt;0.001</b> | 1.14 (1.04, 1.25)     | <b>0.005</b>     |
| Non-White                          | 1.41 (1.19, 1.66) | <b>&lt;0.001</b> | 1.31 (1.10, 1.55) | <b>0.002</b>     | 1.34 (1.11, 1.61)     | <b>0.002</b>     |
|                                    |                   | <i>0.1</i>       |                   | <i>0.208</i>     |                       | <i>0.211</i>     |
| NIHSS >4                           | 1.14 (1.02, 1.27) | <b>0.022</b>     | 1.11 (0.99, 1.24) | 0.08             | 1.11 (1.00, 1.25)     | 0.057            |
| NIHSS ≤4                           | 1.31 (1.16, 1.48) | <b>&lt;0.001</b> | 1.23 (1.09, 1.40) | <b>0.001</b>     | 1.24 (1.09, 1.41)     | <b>&lt;0.001</b> |
|                                    |                   | <i>0.002</i>     |                   | <i>0.002</i>     |                       | <i>0.002</i>     |
| History of depression Yes          | 0.90 (0.73, 1.11) | 0.329            | 0.88 (0.71, 1.09) | 0.235            | 0.84 (0.67, 1.06)     | 0.141            |
| History of depression No           | 1.28 (1.18, 1.39) | <b>&lt;0.001</b> | 1.26 (1.16, 1.37) | <b>&lt;0.001</b> | 1.24 (1.13, 1.35)     | <b>&lt;0.001</b> |
| <b>Readmission with depression</b> |                   |                  |                   |                  |                       |                  |
|                                    |                   | <i>0.579</i>     |                   | <i>0.652</i>     |                       | <i>0.602</i>     |
| Age ≥80y                           | 3.66 (3.09, 4.35) | <b>&lt;0.001</b> | 2.45 (2.04, 2.96) | <b>&lt;0.001</b> | 2.41 (1.96, 2.95)     | <b>&lt;0.001</b> |
| Age <80y                           | 3.43 (2.90, 4.04) | <b>&lt;0.001</b> | 2.31 (1.94, 2.75) | <b>&lt;0.001</b> | 2.24 (1.86, 2.69)     | <b>&lt;0.001</b> |
|                                    |                   | <i>0.013</i>     |                   | <i>0.011</i>     |                       | <i>0.0582</i>    |
| Female                             | 3.09 (2.66, 3.59) | <b>&lt;0.001</b> | 2.10 (1.79, 2.47) | <b>&lt;0.001</b> | 2.10 (1.77, 2.49)     | <b>&lt;0.001</b> |
| Male                               | 4.21 (3.46, 5.12) | <b>&lt;0.001</b> | 2.94 (2.40, 3.61) | <b>&lt;0.001</b> | 2.75 (2.20, 3.44)     | <b>&lt;0.001</b> |
|                                    |                   | <i>0.577</i>     |                   | <i>0.951</i>     |                       | <i>0.584</i>     |
| White                              | 3.47 (3.06, 3.94) | <b>&lt;0.001</b> | 2.37 (2.07, 2.71) | <b>&lt;0.001</b> | 2.27 (1.96, 2.63)     | <b>&lt;0.001</b> |
| Non-White                          | 3.82 (2.78, 5.25) | <b>&lt;0.001</b> | 2.40 (1.73, 3.32) | <b>&lt;0.001</b> | 2.51 (1.80, 3.51)     | <b>&lt;0.001</b> |
|                                    |                   | <i>0.024</i>     |                   | <i>0.195</i>     |                       | <i>0.28</i>      |
| NIHSS >4                           | 2.96 (2.49, 3.52) | <b>&lt;0.001</b> | 2.12 (1.75, 2.56) | <b>&lt;0.001</b> | 2.15 (1.78, 2.60)     | <b>&lt;0.001</b> |
| NIHSS ≤4                           | 3.98 (3.30, 4.81) | <b>&lt;0.001</b> | 2.54 (2.08, 3.10) | <b>&lt;0.001</b> | 2.51 (2.05, 3.06)     | <b>&lt;0.001</b> |
|                                    |                   | <b>&lt;0.001</b> |                   | <b>&lt;0.001</b> |                       | <b>&lt;0.001</b> |
| History of depression Yes          | 1.04 (0.80, 1.35) | 0.775            | 1.02 (0.79, 1.32) | 0.883            | 0.99 (0.76, 1.30)     | 0.956            |

| Outcomes at One Year                               | Unadjusted           |         | Weight Adjusted      |         | NIHSS Weight Adjusted |         |
|----------------------------------------------------|----------------------|---------|----------------------|---------|-----------------------|---------|
|                                                    | HR (95% CI)          | P Value | HR (95% CI)          | P Value | HR (95% CI)           | P Value |
| History of depression No                           | 3.59 (3.13, 4.12)    | <0.001  | 3.27 (2.84, 3.76)    | <0.001  | 3.20 (2.75, 3.72)     | <0.001  |
| <b>Readmission with sepsis</b>                     |                      |         |                      |         |                       |         |
|                                                    |                      | 0.847   |                      | 0.829   |                       | 0.927   |
| Age ≥80y                                           | 1.45 (1.18, 1.78)    | <0.001  | 1.40 (1.13, 1.74)    | 0.002   | 1.35 (1.08, 1.70)     | 0.01    |
| Age <80y                                           | 1.49 (1.23, 1.82)    | <0.001  | 1.36 (1.11, 1.66)    | 0.003   | 1.37 (1.09, 1.72)     | 0.006   |
|                                                    |                      | 0.426   |                      | 0.518   |                       | 0.306   |
| Female                                             | 1.40 (1.15, 1.70)    | <0.001  | 1.32 (1.08, 1.61)    | 0.007   | 1.27 (1.02, 1.58)     | 0.035   |
| Male                                               | 1.58 (1.28, 1.95)    | <0.001  | 1.46 (1.17, 1.80)    | <0.001  | 1.49 (1.19, 1.87)     | <0.001  |
|                                                    |                      | 0.816   |                      | 0.792   |                       | 0.168   |
| White                                              | 1.48 (1.27, 1.71)    | <0.001  | 1.36 (1.17, 1.59)    | <0.001  | 1.29 (1.08, 1.53)     | 0.004   |
| Non-White                                          | 1.53 (1.15, 2.03)    | 0.003   | 1.42 (1.06, 1.90)    | 0.018   | 1.64 (1.20, 2.23)     | 0.002   |
|                                                    |                      | 0.236   |                      | 0.294   |                       | 0.323   |
| NIHSS >4                                           | 1.28 (1.07, 1.55)    | 0.009   | 1.24 (1.03, 1.50)    | 0.025   | 1.28 (1.06, 1.54)     | 0.01    |
| NIHSS ≤4                                           | 1.54 (1.21, 1.97)    | <0.001  | 1.46 (1.14, 1.88)    | 0.003   | 1.49 (1.16, 1.92)     | 0.002   |
|                                                    |                      | 0.005   |                      | 0.004   |                       | 0.011   |
| History of depression Yes                          | 0.80 (0.52, 1.23)    | 0.304   | 0.76 (0.49, 1.17)    | 0.208   | 0.78 (0.49, 1.24)     | 0.292   |
| History of depression No                           | 1.55 (1.34, 1.79)    | <0.001  | 1.51 (1.30, 1.75)    | <0.001  | 1.49 (1.26, 1.75)     | <0.001  |
| <b>Home-Time within 1y post IS discharge, days</b> |                      |         |                      |         |                       |         |
|                                                    |                      | 0.221   |                      | <0.001  |                       | <0.001  |
| Age ≥80y                                           | -27.2 (-34.4, -19.9) | <0.001  | -32.8 (-38.8, -26.8) | <0.001  | -30.9 (-37.4, -24.4)  | <0.001  |
| Age <80y                                           | -24.8 (-32.6, -16.9) | <0.001  | -22.6 (-29.5, -15.7) | <0.001  | -19.1 (-26.7, -11.4)  | <0.001  |
|                                                    |                      | 0.944   |                      | 0.438   |                       | 0.079   |
| Female                                             | -23.1 (-29.9, -16.4) | <0.001  | -28.0 (-33.9, -22.0) | <0.001  | -27.1 (-33.5, -20.6)  | <0.001  |
| Male                                               | -23.7 (-32.4, -14.9) | <0.001  | -26.5 (-33.5, -19.5) | <0.001  | -21.7 (-29.4, -14.0)  | <0.001  |
|                                                    |                      | 0.416   |                      | 0.324   |                       | 0.955   |
| White                                              | -23.6 (-29.5, -17.6) | <0.001  | -26.9 (-32.6, -21.3) | <0.001  | -25.4 (-31.5, -19.2)  | <0.001  |
| Non-White                                          | -28.7 (-41.3, -16.2) | <0.001  | -30.8 (-40.0, -21.5) | <0.001  | -24.9 (-35.1, -14.8)  | <0.001  |
|                                                    |                      | 0.033   |                      | 0.021   |                       | 0.021   |
| NIHSS >4                                           | -10.0 (-17.3, -2.7)  | 0.008   | -17.7 (-24.1, -11.4) | <0.001  | -17.9 (-24.1, -11.6)  | <0.001  |
| NIHSS ≤4                                           | -26.0 (-35.0, -17.0) | <0.001  | -31.3 (-38.8, -23.7) | <0.001  | -31.5 (-39.3, -23.8)  | <0.001  |
|                                                    |                      | <0.001  |                      | <0.001  |                       | <0.001  |

| Outcomes at One Year      | Unadjusted           |                  | Weight Adjusted      |                  | NIHSS Weight Adjusted |                  |
|---------------------------|----------------------|------------------|----------------------|------------------|-----------------------|------------------|
|                           | HR (95% CI)          | P Value          | HR (95% CI)          | P Value          | HR (95% CI)           | P Value          |
| History of depression Yes | 3.2 (-11.9, 18.3)    | 0.681            | 3.1 (-7.2, 13.4)     | 0.553            | 6.6 (-4.6, 17.8)      | 0.249            |
| History of depression No  | -27.4 (-33.2, -21.5) | <b>&lt;0.001</b> | -32.3 (-37.9, -26.7) | <b>&lt;0.001</b> | -30.3 (-36.4, -24.3)  | <b>&lt;0.001</b> |

Italics denotes *P* value for the interaction of AD use and outcomes between subgroups.

**Supplementary Figure S1:** Weight-adjusted propensity model for estimated probability of AD treatment.

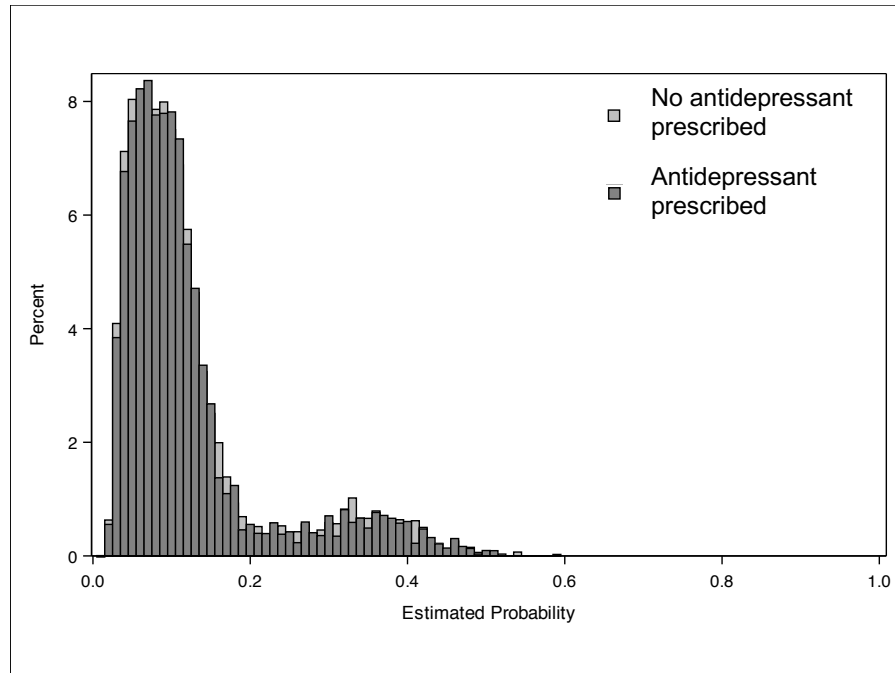

**Supplementary Figure S2:** Propensity model for absolute standardized differences in the clinical variables before and after overlap and NIHSS overlap weighting.

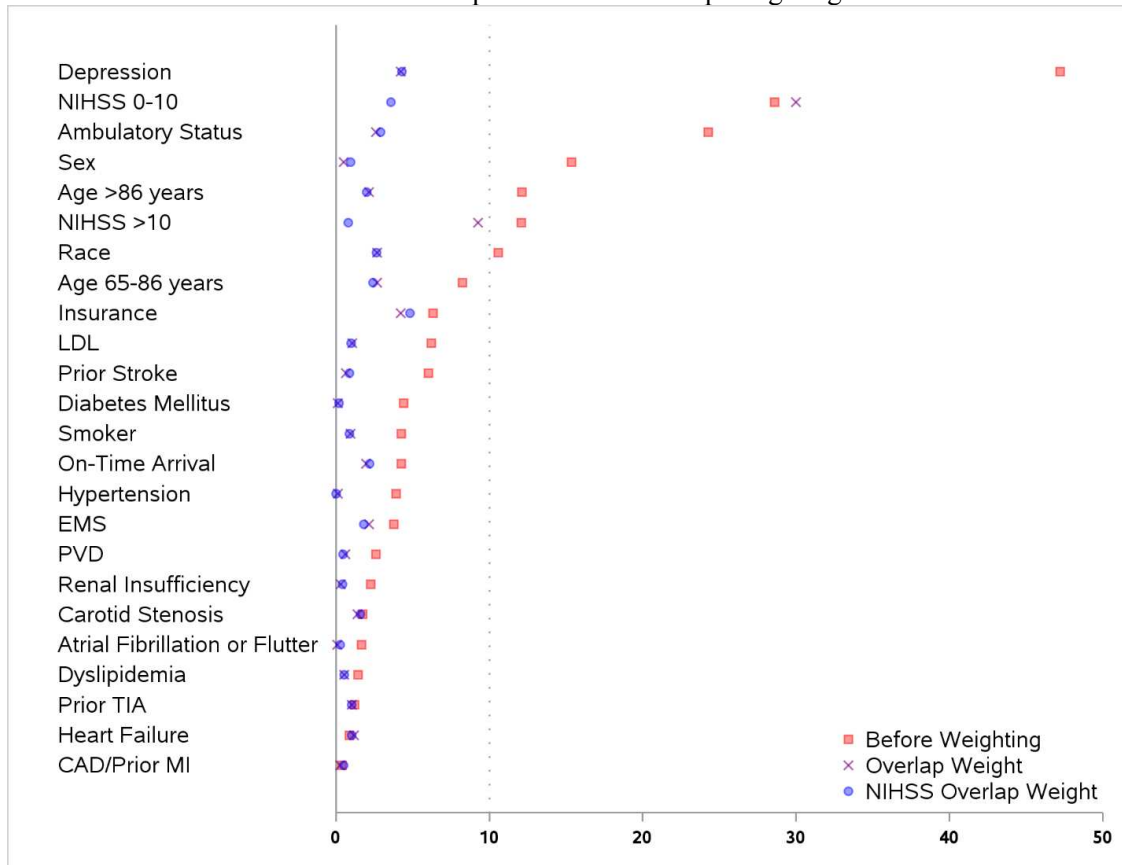

**Supplementary Figure S3:** Cumulative incidence plots for 1 year follow-up readmission outcomes in AD naïve patients for A) composite mortality/readmission; B) ICH readmission; and C) sepsis readmission.

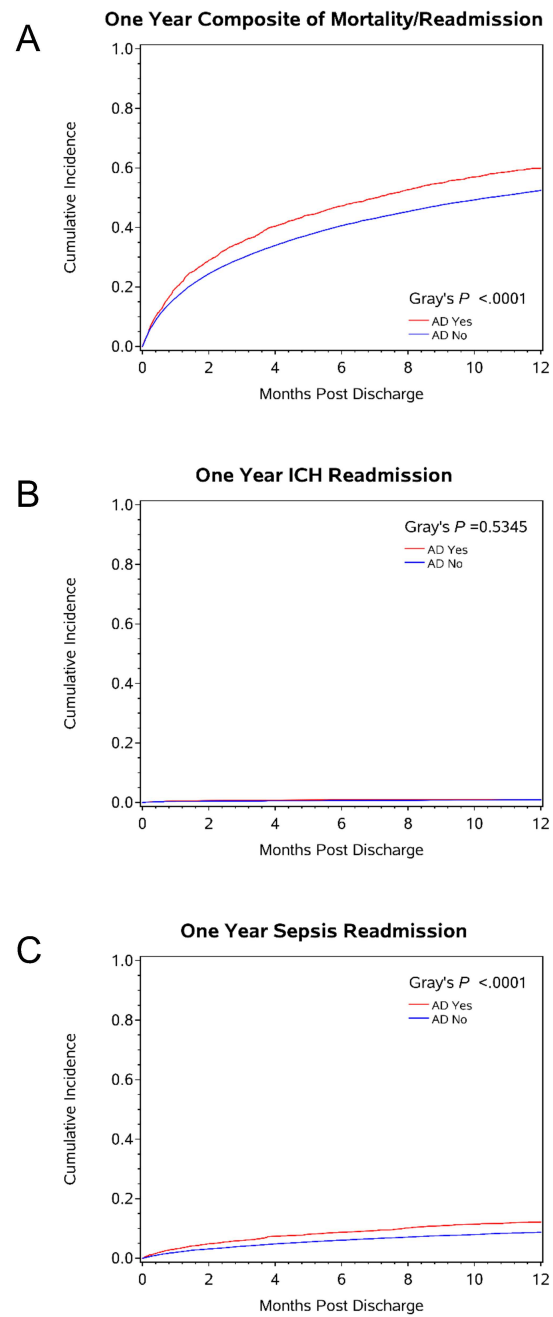

Supplement: svn-2020-000691supp001.pdf [file svn-2020-000691supp001.pdf]
